# Supplementary material
Source: PubMed Central journal article supplement (PMC1924595)

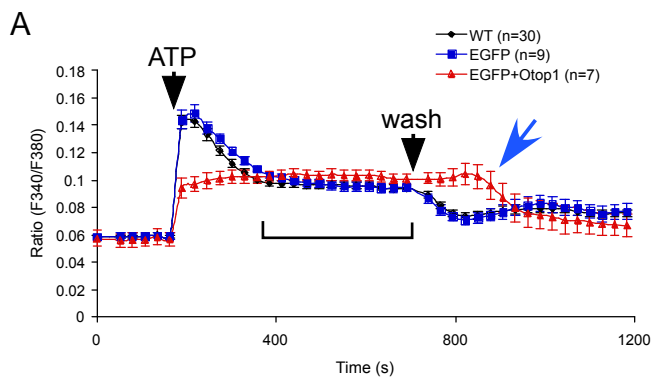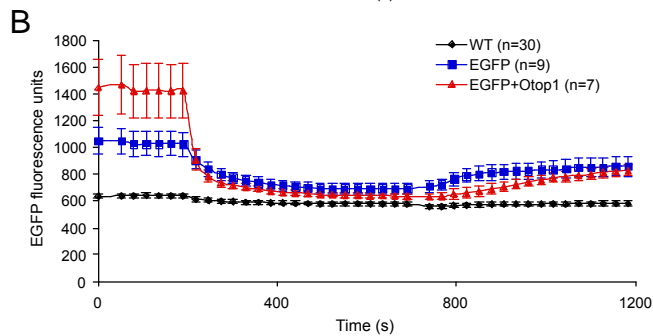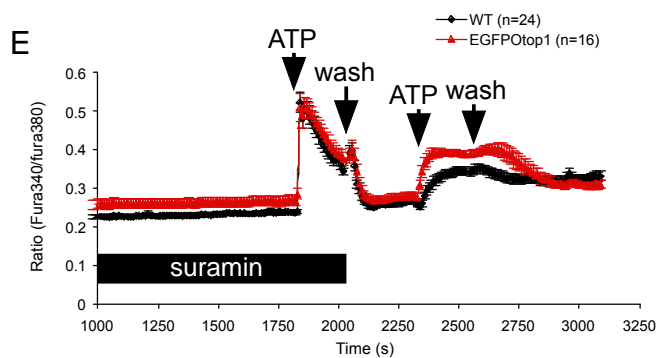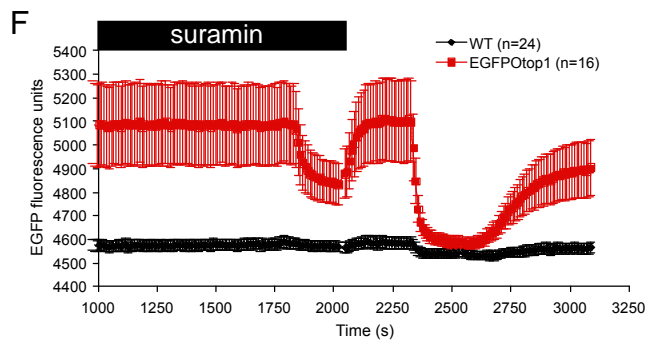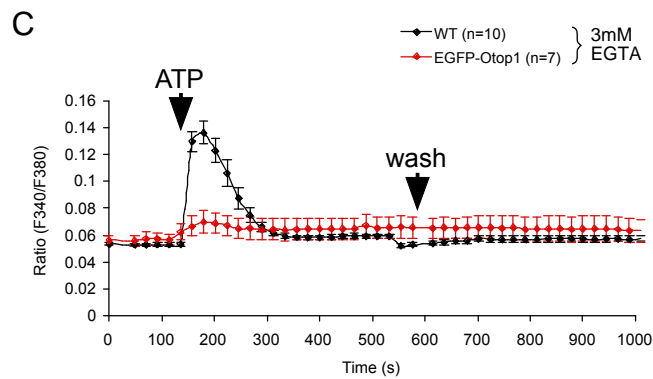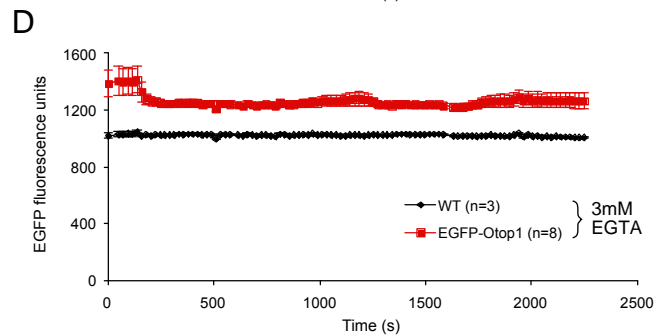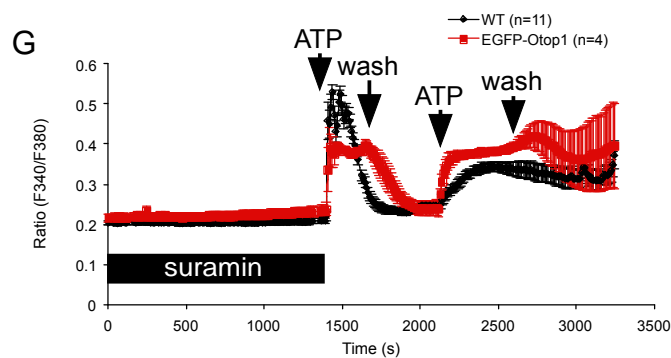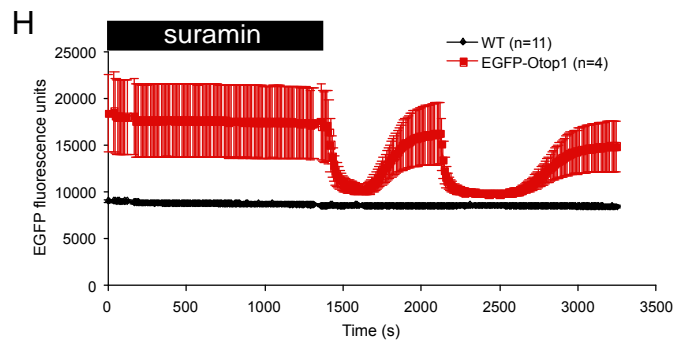

Supplement: pnas_0705182104_1.pdf [file pnas_0705182104_1.pdf]

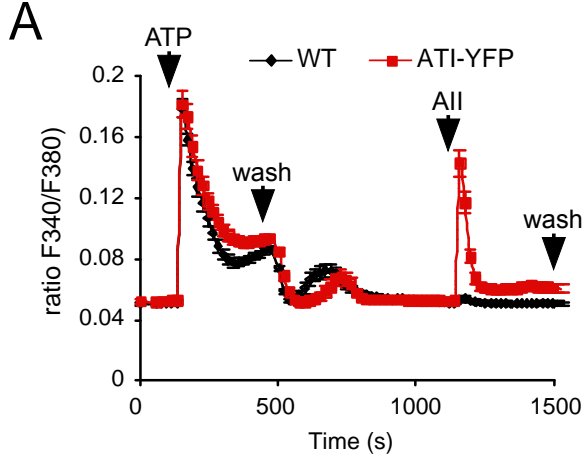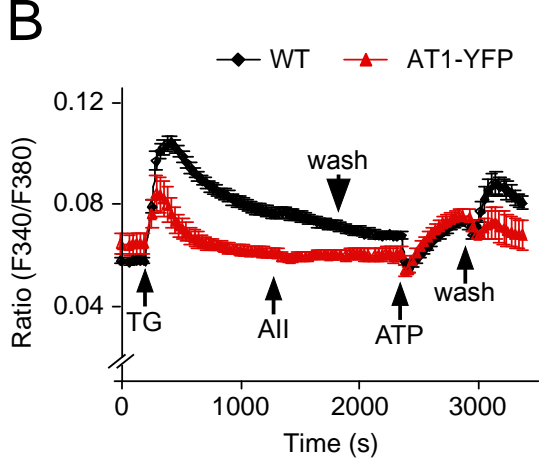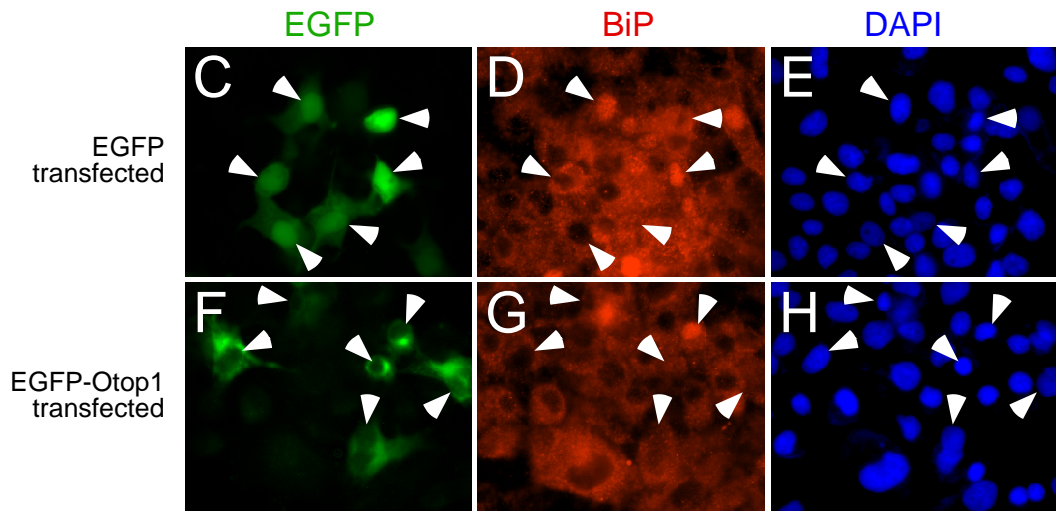

Supplement: pnas_0705182104_2.pdf [file pnas_0705182104_2.pdf]
